# Supplementary material
Source: MDPI journal article supplement (https://www.mdpi.com/1999-4907/13/2/353)
Supplement: s1 [file s1]

**Table S1.** Frequency of mycorrhizal fungal taxa of 1-year old Scots pine seedlings growing in different microsites created by MSP methods. Different letters indicate significant differences according to the Tukey test,  $P < 0.05$ .

| Fungal Taxa                       | Forest Plough |         | Active Plough |         | Forest Mill | Without MSP | p       |
|-----------------------------------|---------------|---------|---------------|---------|-------------|-------------|---------|
|                                   | Ridge         | Furrow  | Ridge         | Furrow  | Strip       |             |         |
| Ascomycetes                       |               |         |               |         |             |             |         |
| <i>Acephala macrosclerotiorum</i> |               | 0.88    |               |         | 0.86        | 1.14        |         |
| <i>Cenococcum geophilum</i>       | 2.68 a        | 10.62 b | 31.48 c       | 10.62 b | 17.24 b     | 26.14 c     | <0.0001 |
| <i>Helotiales</i> sp.             |               | 1.77    | 0.93          | 2.65    |             |             |         |
| <i>Hyaloscypha bicolor</i>        | 8.04 a        | 12.39 c | 8.33 a        | 9.73 b  | 8.62 a      |             | 0.0231  |
| <i>Hyaloscypha finlandica</i>     | 0.89 a        | 2.65 b  |               | 1.77 a  | 2.59 b      | 4.55 c      | 0.0006  |
| <i>Hyaloscypha variabilis</i>     | 4.46 b        | 1.77 a  | 0.93          |         | 6.03 c      | 7.95 c      | <0.0001 |
| <i>Hyaloscypha</i> sp.            | 5.36          |         |               |         |             | 1.14        |         |
| <i>Wilcoxins mikolae</i>          | 98.21 b       | 91.15 a | 98.15 b       | 99.12 c | 96.55 ab    | 97.73 b     | 0.0042  |
| <i>Wilcoxina rehmsii</i>          |               | 2.65    |               |         | 0.86        |             |         |
| <i>Wilcoxina</i> sp.              |               |         |               |         |             | 1.14        |         |
| Basidiomycetes                    |               |         |               |         |             |             |         |
| <i>Amanita pantherina</i>         |               | 3.54    |               |         |             | 3.41        |         |
| <i>Amanita spissa</i>             |               | 0.88    |               |         |             |             |         |
| <i>Boletus edulis</i>             |               |         |               | 2.65    |             |             |         |
| <i>Boletus ferrugineus</i>        |               |         |               | 0.88    |             |             |         |
| <i>Cantharellus cibarius</i>      |               | 1.77    |               |         |             |             |         |
| <i>Cortinarius bataillei</i>      |               |         | 0.93          |         |             |             |         |
| <i>Cortinarius cinnamomeus</i>    |               |         | 0.93          |         | 7.76        |             |         |
| <i>Cortinarius croceus</i>        | 0.89          |         |               |         | 3.45        |             |         |
| <i>Inocybe lacera</i>             |               | 1.77 a  | 0.93 a        | 1.77 a  | 0.86 a      | 2.27 a      | 0.4352  |
| <i>Inocybe umbrina</i>            |               | 1.77    |               |         |             |             |         |
| <i>Laccaria proxima</i>           |               |         |               |         | 2.59        |             |         |
| <i>Lactarius rufus</i>            |               |         | 0.93          |         |             |             |         |

|                                |         |         |         |         |         |         |         |
|--------------------------------|---------|---------|---------|---------|---------|---------|---------|
| <i>Paxillus involutus</i>      |         |         | 0.93    |         | 2.59    |         |         |
| <i>Piloderma olivaceum</i>     |         |         |         |         | 0.86    |         |         |
| <i>Piloderma sphaerosporum</i> |         | 1.77    | 0.93    |         |         | 1.14    |         |
| <i>Rhizopogon evadens</i>      |         |         |         |         | 6.03    |         |         |
| <i>Rhizopogon roseolus</i>     |         |         | 0.88    |         |         |         |         |
| <i>Rhizopogon rubescens</i>    |         |         |         |         |         | 2.27    |         |
| <i>Russula adusta</i>          |         | 0.88    |         |         |         |         |         |
| <i>Russula aeruginea</i>       |         | 0.88    |         |         |         |         |         |
| <i>Russula decolorans</i>      | 0.89 a  | 1.77 a  | 12.96 b | 1.77 a  | 1.72 a  | 12,50 b | <0.0001 |
| <i>Russula emetica</i>         |         |         |         |         |         | 1.14    |         |
| <i>Russula paludosa</i>        | 5.36 a  | 0.88 a  | 2.78 a  | 2.65 a  |         | 3.41    | 0.1981  |
| <i>Russula vesca</i>           |         |         |         |         |         | 1.14    |         |
| <i>Russula vinosa</i>          | 2.68    |         | 0.93    |         |         | 1.14    |         |
| <i>Russula</i> sp.             | 0.89    |         |         |         |         |         |         |
| <i>Suillus bovinus</i>         | 0.89 a  | 1 77 ab | 0.93 a  | 2.65 b  | 3.45 c  | 3.41 c  | 0.0321  |
| <i>Suillus granulatus</i>      |         |         |         |         | 1.72    |         |         |
| <i>Suillus luteus</i>          | 0.89 a  | 2.65 b  |         | 3.54 c  | 3.45 bc | 1.14 a  | 0.0098  |
| <i>Suillus variagatus</i>      |         |         |         |         | 2.59    |         |         |
| <i>Thelephora terrestris</i>   | 1.79 a  | 6.19 b  | 8.33 c  | 1.77 a  | 4.31 b  | 11.36 d | <0.0001 |
| <i>Tomentella badia</i>        |         | 0.88    |         |         |         | 1.14    |         |
| <i>Tomentella</i> sp.          |         |         |         | 0.88    |         |         |         |
| <i>Tomentelopsis</i> sp.       |         |         |         |         | 1.72    | 2.27    |         |
| <i>Tylospora asterophora</i>   | 3.57 ab | 16.81 d | 2.78 a  | 12.39 c | 7.76 b  | 1.14 a  | <0.0001 |
| <i>Xerocomus badius</i>        | 0.89    |         |         |         | 1.72    | 6.82    |         |

**Table S2.** Values of Spearman rank coefficients for the correlation between soil features and the relative abundance of mycorrhizal fungal species. Bold values indicate differences significant at  $P \leq 0.05$ .

| Fungal Taxa/ Feature              | pH (KCl)       | Norg          | Corg           | C/N           | P2O5           | Ca2+           | K+             | Mg2+           | Na+            | Exchangeable Acidity | Bulk Density  | Actual Moisture | Sand (%)      | Silt (%)       | Clay (%)       |
|-----------------------------------|----------------|---------------|----------------|---------------|----------------|----------------|----------------|----------------|----------------|----------------------|---------------|-----------------|---------------|----------------|----------------|
| Ascomycetes                       |                |               |                |               |                |                |                |                |                |                      |               |                 |               |                |                |
| <i>Acephala macrosclerotiorum</i> | 0.0207         | -0.2147       | -0.2147        | 0.2656        | 0.3737         | -0.2688        | -0.2688        | -0.2147        | 0.0207         | -0.0525              | 0.2688        | 0.1288          | 0.3912        | -0.4183        | -0.401         |
| <i>Cenococcum geophilum</i>       | <b>-0.571</b>  | 0.2797        | 0.3168         | 0.3127        | -0.1063        | 0.2797         | 0.3003         | 0.3106         | 0.1311         | <b>0.5026</b>        | -0.1992       | 0.1476          | -0.1641       | 0.418          | -0.0392        |
| <i>Helotiales sp.</i>             | 0.3729         | -0.3854       | -0.3854        | -0.367        | <b>0.4832</b>  | -0.3712        | -0.3344        | -0.3344        | 0.1658         | <b>-0.4435</b>       | 0.3797        | -0.1828         | 0.4067        | -0.401         | -0.3828        |
| <i>Hyaloscypha bicolor</i>        | <b>0.443</b>   | -0.1904       | -0.2282        | -0.0999       | 0.143          | -0.265         | -0.2598        | -0.2598        | -0.4154        | -0.2366              | 0.3565        | -0.386          | 0.0999        | -0.2861        | 0.1973         |
| <i>Hyaloscypha finlandica</i>     | 0.2826         | -0.3894       | -0.4126        | 0.0364        | 0.3023         | -0.3552        | -0.4104        | -0.3861        | -0.2273        | -0.2339              | 0.4214        | -0.0552         | <b>0.5075</b> | -0.3221        | -0.4067        |
| <i>Hyaloscypha variabilis</i>     | -0.1876        | 0.0363        | 0.0363         | -0.1201       | 0.1462         | -0.0011        | 0.1484         | 0.0986         | 0.3988         | -0.0113              | -0.0963       | -0.2221         | 0.0952        | 0.1699         | -0.3911        |
| <i>Hyaloscypha sp.</i>            | -0.0303        | 0.0775        | 0.0775         | -0.1134       | 0.1058         | 0.1096         | 0.1776         | 0.1455         | 0.3855         | 0.1058               | -0.257        | <b>0.446</b>    | 0.0265        | 0.1379         | -0.2524        |
| <i>Wilcoxina mikolae</i>          | <b>0.4574</b>  | <b>-0.515</b> | <b>-0.4737</b> | -0.0464       | 0.3622         | <b>-0.4737</b> | <b>-0.4303</b> | <b>-0.4262</b> | 0.2446         | <b>-0.6078</b>       | <b>0.4551</b> | -0.1393         | <b>0.5067</b> | <b>-0.5397</b> | <b>-0.4347</b> |
| <i>Wilcoxina rehmsii</i>          | 0.2023         | -0.223        | -0.223         | 0.0132        | 0.0151         | -0.1909        | -0.155         | -0.155         | -0.1739        | -0.1228              | 0.291         | 0.0888          | 0.1833        | -0.0831        | -0.2193        |
| <i>Wilcoxina sp.</i>              | -0.3976        | 0.0701        | 0.0701         | 0.3974        | -0.1636        | 0.0701         | -0.0701        | 0.0234         | -0.2104        | 0.3974               | -0.0234       | 0.3974          | 0.0234        | -0.0701        | 0.0234         |
| Basidiomycetes                    |                |               |                |               |                |                |                |                |                |                      |               |                 |               |                |                |
| <i>Amanita pantherina</i>         | -0.1383        | -0.1445       | -0.1445        | <b>0.5321</b> | -0.1922        | -0.17          | -0.2939        | -0.2621        | <b>-0.4749</b> | 0.1763               | 0.0905        | 0.1509          | -0.027        | 0.0429         | 0.0556         |
| <i>Amanita spissa</i>             | 0.1637         | -0.3506       | -0.3506        | -0.1636       | 0.2571         | -0.3039        | -0.3039        | -0.3039        | -0.0701        | -0.2571              | 0.3974        | -0.2104         | 0.3974        | -0.3039        | -0.3976        |
| <i>Boletus edulis</i>             | 0.3781         | -0.3987       | <b>-0.4346</b> | -0.3137       | 0.3345         | -0.4025        | <b>-0.4346</b> | <b>-0.4346</b> | -0.1285        | -0.3987              | 0.4101        | -0.3175         | 0.3704        | <b>-0.4346</b> | -0.1947        |
| <i>Boletus ferrugineus</i>        | 0.2572         | -0.2104       | -0.1636        | 0.3039        | -0.0234        | -0.1636        | -0.1636        | -0.1636        | -0.3506        | -0.2104              | 0.1636        | 0.1169          | -0.0234       | -0.1636        | 0.2105         |
| <i>Cantharellus cibarius</i>      | 0.3976         | -0.2571       | -0.2571        | 0.2571        | 0.0701         | -0.2571        | -0.3506        | -0.3506        | -0.3039        | -0.3039              | 0.2104        | -0.1169         | 0.0701        | -0.1169        | 0.1169         |
| <i>Cortinarius bataillei</i>      | -0.3508        | 0.3506        | 0.3506         | 0.0234        | -0.1169        | 0.3506         | 0.3506         | 0.3506         | 0.0234         | 0.3506               | -0.2104       | -0.3039         | -0.3974       | 0.3974         | 0.3508         |
| <i>Cortinarius cinnamomeus</i>    | -0.0048        | 0.3034        | 0.3034         | 0.0588        | -0.0524        | 0.3034         | 0.3352         | 0.3352         | 0.0048         | 0.1477               | -0.2462       | 0.0778          | -0.17         | 0.3161         | 0.1271         |
| <i>Cortinarius croceus</i>        | -0.0388        | 0.1946        | 0.1946         | -0.051        | <b>-0.4346</b> | 0.2268         | 0.2627         | 0.2627         | 0.0831         | 0.0057               | -0.1587       | 0.1209          | -0.2664       | 0.3023         | 0.1664         |
| <i>Inocybe lacera</i>             | -0.1242        | -0.0467       | -0.016         | 0.3577        | -0.1893        | -0.0602        | -0.1684        | -0.1401        | -0.3024        | 0.1254               | 0.0934        | -0.0836         | 0.0234        | 0.0443         | 0.1384         |
| <i>Inocybe umbrina</i>            | 0.3976         | -0.2571       | -0.2571        | 0.2571        | 0.0701         | -0.2571        | -0.3506        | -0.3506        | -0.3039        | -0.3039              | 0.2104        | -0.1169         | 0.0701        | -0.1169        | 0.1169         |
| <i>Laccaria proxima</i>           | 0.0588         | 0.0079        | 0.0079         | 0.3129        | 0.1858         | 0.0079         | 0.0397         | 0.0397         | 0.0461         | -0.0365              | 0.0238        | 0.0334          | 0.1668        | -0.0334        | -0.2432        |
| <i>Lactarius rufus</i>            | -0.2572        | 0.2104        | 0.3039         | 0.1169        | -0.3506        | 0.2571         | 0.2571         | 0.2571         | 0.3506         | 0.1636               | -0.1636       | 0.1636          | -0.2104       | 0.2104         | 0.2572         |
| <i>Paxillus involutus</i>         | -0.2591        | 0.2303        | 0.2303         | 0.2176        | 0.2494         | 0.2303         | 0.2303         | 0.2303         | 0.1731         | 0.1541               | -0.135        | -0.3796         | -0.0238       | 0.1255         | -0.0524        |
| <i>Piloderma olivaceum</i>        | -0.1169        | 0.1169        | 0.1169         | -0.0234       | 0.2104         | 0.1169         | 0.1169         | 0.1169         | 0.2104         | -0.0234              | -0.1169       | -0.3974         | 0.1636        | 0.0234         | -0.1403        |
| <i>Piloderma sphaerosporum</i>    | 0.0936         | -0.18         | -0.18          | 0.0411        | 0.0879         | -0.2664        | -0.1984        | -0.2253        | -0.1899        | -0.0723              | 0.1955        | -0.3755         | -0.0156       | 0.0723         | -0.0142        |
| <i>Rhizopogon evadens</i>         | 0.1169         | 0.0234        | 0.0234         | 0.1636        | -0.2104        | 0.0234         | 0.0701         | 0.0701         | -0.1636        | 0.0701               | 0.0234        | 0.3039          | -0.1169       | 0.1636         | 0.0702         |
| <i>Rhizopogon roseolus</i>        | 0.2105         | -0.3974       | -0.3974        | -0.1169       | 0.3039         | -0.3506        | -0.3974        | -0.3974        | 0.2571         | -0.3974              | 0.2571        | -0.0701         | 0.3039        | -0.3974        | -0.2572        |
| <i>Rhizopogon rubescens</i>       | -0.3976        | 0.0701        | 0.0701         | 0.3974        | -0.1636        | 0.0701         | -0.0701        | 0.0234         | -0.2104        | 0.3974               | -0.0234       | 0.3974          | 0.0234        | -0.0701        | 0.0234         |
| <i>Russula adusta</i>             | 0.1637         | -0.3506       | -0.3506        | -0.1636       | 0.2571         | -0.3039        | -0.3039        | -0.3039        | -0.0701        | -0.2571              | 0.3974        | -0.2104         | 0.3974        | -0.3039        | -0.3976        |
| <i>Russula aeruginea</i>          | 0.3508         | -0.3039       | -0.3039        | -0.3506       | 0.3974         | -0.3974        | -0.2571        | -0.2571        | 0.1636         | -0.3506              | 0.3506        | -0.2571         | 0.3506        | -0.3506        | -0.304         |
| <i>Russula decolorans</i>         | <b>-0.6059</b> | 0.403         | 0.4241         | 0.1326        | <b>-0.4325</b> | 0.4093         | 0.3851         | 0.4114         | -0.04          | <b>0.4998</b>        | -0.2767       | -0.0926         | -0.3841       | <b>0.5482</b>  | 0.2316         |
| <i>Russula emetica</i>            | -0.0702        | -0.0701       | -0.0701        | 0.0701        | 0.0234         | -0.0234        | 0.0234         | -0.0234        | 0.1169         | 0.0234               | 0.0701        | 0.2571          | 0.1169        | 0.0701         | -0.2105        |
| <i>Russula paludosa</i>           | -0.3712        | 0.2458        | 0.2764         | -0.1314       | -0.2742        | 0.2696         | 0.2526         | 0.2742         | 0.1076         | 0.3252               | -0.1643       | -0.0895         | -0.1971       | 0.2776         | 0.1343         |
| <i>Russula vesca</i>              | -0.304         | -0.0234       | -0.0234        | 0.2104        | -0.2571        | -0.0701        | -0.0234        | -0.0701        | -0.2571        | 0.2571               | -0.0701       | -0.0234         | -0.1636       | 0.3039         | -0.0702        |

|                              |                |                |                |         |                |                |               |                |         |                |                |                |                |                |                |
|------------------------------|----------------|----------------|----------------|---------|----------------|----------------|---------------|----------------|---------|----------------|----------------|----------------|----------------|----------------|----------------|
| <i>Russula vinosa</i>        | <b>-0.6139</b> | <b>0.5229</b>  | <b>0.4803</b>  | -0.1034 | <b>-0.5455</b> | <b>0.5101</b>  | 0.4081        | <b>0.4619</b>  | 0.0312  | <b>0.503</b>   | <b>-0.4237</b> | -0.0213        | <b>-0.4931</b> | 0.3174         | <b>0.4792</b>  |
| <i>Russula sp.</i>           | -0.1871        | 0.2571         | 0.2571         | -0.2571 | -0.3974        | 0.3039         | 0.3039        | 0.3039         | 0.3039  | -0.0701        | -0.2571        | -0.1636        | -0.2571        | 0.2571         | 0.1637         |
| <i>Suillus bovinus</i>       | 0.0157         | -0.3995        | -0.3726        | 0.2376  | 0.2775         | -0.3369        | -0.3207       | -0.3596        | 0.1188  | -0.2538        | 0.3272         | -0.0562        | <b>0.4384</b>  | -0.3164        | <b>-0.5159</b> |
| <i>Suillus granulatus</i>    | -0.1169        | 0.1169         | 0.1169         | -0.0234 | 0.2104         | 0.1169         | 0.1169        | 0.1169         | 0.2104  | -0.0234        | -0.1169        | -0.3974        | 0.1636         | 0.0234         | -0.1403        |
| <i>Suillus luteus</i>        | 0.2924         | -0.2289        | -0.2946        | -0.0693 | 0.3932         | -0.2641        | -0.3087       | -0.3251        | -0.2594 | -0.2594        | 0.3064         | -0.3885        | 0.4214         | -0.3862        | -0.2595        |
| <i>Suillus variegatus</i>    | 0.0095         | 0.0983         | 0.0983         | 0.1096  | -0.017         | 0.0983         | 0.1342        | 0.1342         | 0.0189  | 0.0378         | -0.0624        | -0.0397        | 0.0227         | 0.1417         | -0.0425        |
| <i>Thelephora terrestris</i> | <b>-0.4759</b> | 0.3403         | 0.3434         | 0.1878  | -0.1867        | 0.3029         | 0.2386        | 0.2303         | -0.0384 | <b>0.4367</b>  | -0.279         | -0.1473        | -0.2811        | 0.306          | 0.2496         |
| <i>Tomentella badia</i>      | -0.1928        | -0.1871        | -0.1871        | 0.1927  | 0.051          | -0.155         | -0.2627       | -0.1909        | -0.2098 | 0.1285         | 0.2551         | 0.1606         | 0.291          | -0.2627        | -0.2552        |
| <i>Tomentella sp.</i>        | 0.2572         | -0.2104        | -0.1636        | 0.3039  | -0.0234        | -0.1636        | -0.1636       | -0.1636        | -0.3506 | -0.2104        | 0.1636         | 0.1169         | -0.0234        | -0.1636        | 0.2105         |
| <i>Tomentellopsis sp.</i>    | -0.2018        | -0.0302        | -0.0302        | 0.3542  | 0.1954         | -0.0588        | -0.0302       | -0.0588        | 0.0048  | 0.0651         | -0.027         | -0.1827        | 0.1636         | 0.0238         | -0.3576        |
| <i>Tylospora asterophora</i> | <b>0.5667</b>  | <b>-0.5996</b> | <b>-0.6141</b> | -0.3776 | <b>0.6297</b>  | <b>-0.5944</b> | <b>-0.584</b> | <b>-0.5571</b> | 0.0322  | <b>-0.7064</b> | <b>0.5851</b>  | <b>-0.5664</b> | <b>0.6681</b>  | <b>-0.6919</b> | <b>-0.4774</b> |
| <i>Xerocomus badius</i>      | -0.3194        | 0.2113         | 0.2113         | 0.1287  | 0.0747         | 0.2113         | 0.1445        | 0.2081         | 0.2144  | 0.3288         | -0.3225        | 0.2684         | 0.0619         | 0.0365         | -0.1462        |
